# Supplementary material
Source: PubMed Central journal article supplement (PMC3193368)
Supplement: 10.3163.1536-5050.99.4.005.sg001.pdf [file 10.3163.1536-5050.99.4.005.sg001.pdf]

**A pilot study to evaluate learning style–tailored information prescriptions for hypertensive emergency department patients**

**Taneyia Y. Koonce, MSLS, MPH; Nunzia B. Giuse, MD, MLS, AHIP, FMLA; Alan B. Storrow, MD**

**Figure 2**  
Study participants Visual, Aural, Read/Write, Kinesthetic (VARK) learning style distributions\*

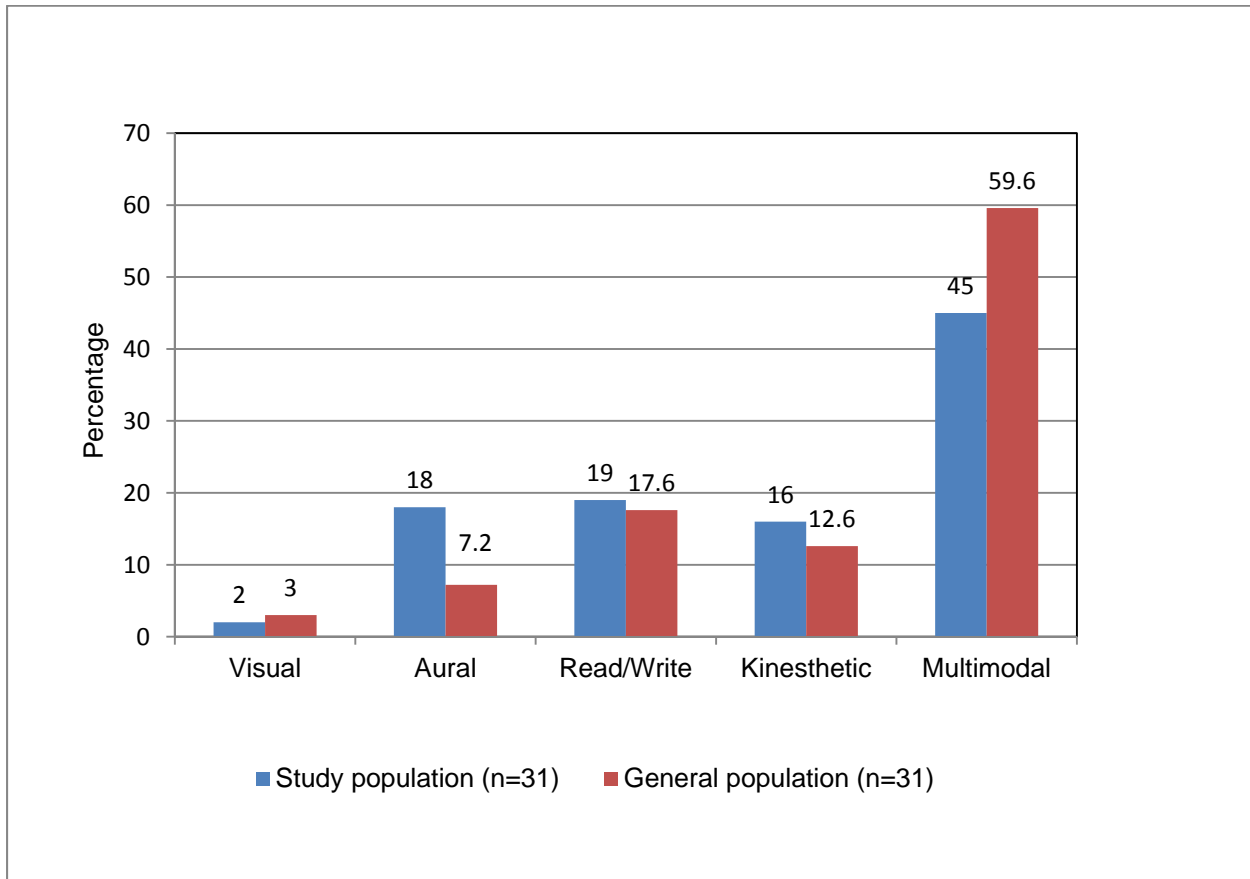

\* Population defined by sample of 50,000 respondents to the online VARK questionnaire as published in Fleming N, Mills C. Not another inventory, rather a catalyst for reflection. To Improve Acad Resour Fac Instructional Organ Dev. 1992;11:137–49.
