# Supplementary material
Source: PubMed Central journal article supplement (PMC3193368)
Supplement: 10.3163.1536-5050.99.4.005.sg002.pdf [file 10.3163.1536-5050.99.4.005.sg002.pdf]

**A pilot study to evaluate learning style–tailored information prescriptions for hypertensive emergency department patients**

**Taneya Y. Koonce, MSLS, MPH; Nunzia B. Giuse, MD, MLS, AHIP, FMLA; Alan B. Storrow, MD**

**Table 3**  
Baseline item response analysis of the “Check Your High Blood Pressure IQ” quiz

| <b>Quiz statement</b>                                                                     | <b>Number of incorrect responses (n=76)</b> |
|-------------------------------------------------------------------------------------------|---------------------------------------------|
| Stress causes high blood pressure                                                         | 67                                          |
| High blood pressure has no symptoms                                                       | 59                                          |
| High blood pressure has no cure                                                           | 58                                          |
| You have to exercise vigorously every day to improve your blood pressure and heart health | 37                                          |
| If your mother or father had high blood pressure, you’ll get it                           | 25                                          |
| There is nothing you can do to prevent high blood pressure                                | 9                                           |
| Blood pressure is high when it is at or over 140/90 mmHg                                  | 9                                           |
| Drinking alcohol lowers blood pressure                                                    | 6                                           |
| Young adults don’t get high blood pressure                                                | 4                                           |
| High blood pressure is not life threatening                                               | 4                                           |
| If you are overweight, you are 2 to 6 times more likely to develop high blood pressure    | 2                                           |
| Americans eat 2 to 3 times more salt and sodium than they need                            | 2                                           |
